# Supplementary material for: Synthesis and magnetic properties of two fluorophosphates K2Mn(PO3F)F3 and Na2Mn(HPO4)F3 with a S = 2 uniform spin chain structure
Source: Royal Society of Chemistry journal article supplement (doi:10.1039/d4ce00180j), 2024-01-01
Supplement: d4ce00180j1.pdf [file d4ce00180j1.pdf]

## Supporting Information

### Synthesis and magnetic properties of two fluorophosphates $\text{K}_2\text{Mn}(\text{PO}_3\text{F})\text{F}_3$ and $\text{Na}_2\text{Mn}(\text{HPO}_4)\text{F}_3$ with a $S = 2$ uniform spin chain structure

Qi Luo<sup>a</sup>, Ningxia Li<sup>a</sup>, Zhiying Zhao<sup>a</sup>, Meiyan Cui<sup>a</sup>, Zhangzhen He<sup>a</sup>

<sup>a</sup>State Key Laboratory of Structural Chemistry, Fujian Institute of Research on the Structure of Matter, Chinese Academy of Sciences, Fuzhou 350002, China

\*E-mail: [hc1988@hotmail.com](mailto:hc1988@hotmail.com); [hezz@fjirsm.ac.cn](mailto:hezz@fjirsm.ac.cn).

**Fig. S1.** The powder XRD patterns of  $\text{K}_2\text{Mn}(\text{PO}_3\text{F})\text{F}_3$  and  $\text{Na}_2\text{Mn}(\text{HPO}_4)\text{F}_3$ .

**Fig. S2.** The energy-dispersive spectrometry (EDS) elemental analyses of  $\text{K}_2\text{Mn}(\text{PO}_3\text{F})\text{F}_3$  and  $\text{Na}_2\text{Mn}(\text{HPO}_4)\text{F}_3$ .

**Fig. S3.** Heat capacity data at 2-120 K for  $\text{K}_2\text{Mn}(\text{PO}_3\text{F})\text{F}_3$  and  $\text{Na}_2\text{Mn}(\text{HPO}_4)\text{F}_3$ . The inset shows an enlarged view of low temperature.

**Fig. S4.**  $dM/dH$  vs  $H$  curves for  $\text{K}_2\text{Mn}(\text{PO}_3\text{F})\text{F}_3$  and  $\text{Na}_2\text{Mn}(\text{HPO}_4)\text{F}_3$ .

**Fig. S5.** Heat capacity data of  $\text{K}_2\text{Mn}(\text{PO}_3\text{F})\text{F}_3$  and  $\text{Na}_2\text{Mn}(\text{HPO}_4)\text{F}_3$  with lattice and magnetic contributions.

**Fig. S6.** Magnetic heat capacity and corresponding magnetic entropy for  $\text{K}_2\text{Mn}(\text{PO}_3\text{F})\text{F}_3$  and  $\text{Na}_2\text{Mn}(\text{HPO}_4)\text{F}_3$ .

**Table S1.** The valence bond calculations for  $\text{K}_2\text{Mn}(\text{PO}_3\text{F})\text{F}_3$ .

**Table S2.** The valence bond calculations for  $\text{Na}_2\text{Mn}(\text{HPO}_4)\text{F}_3$ .

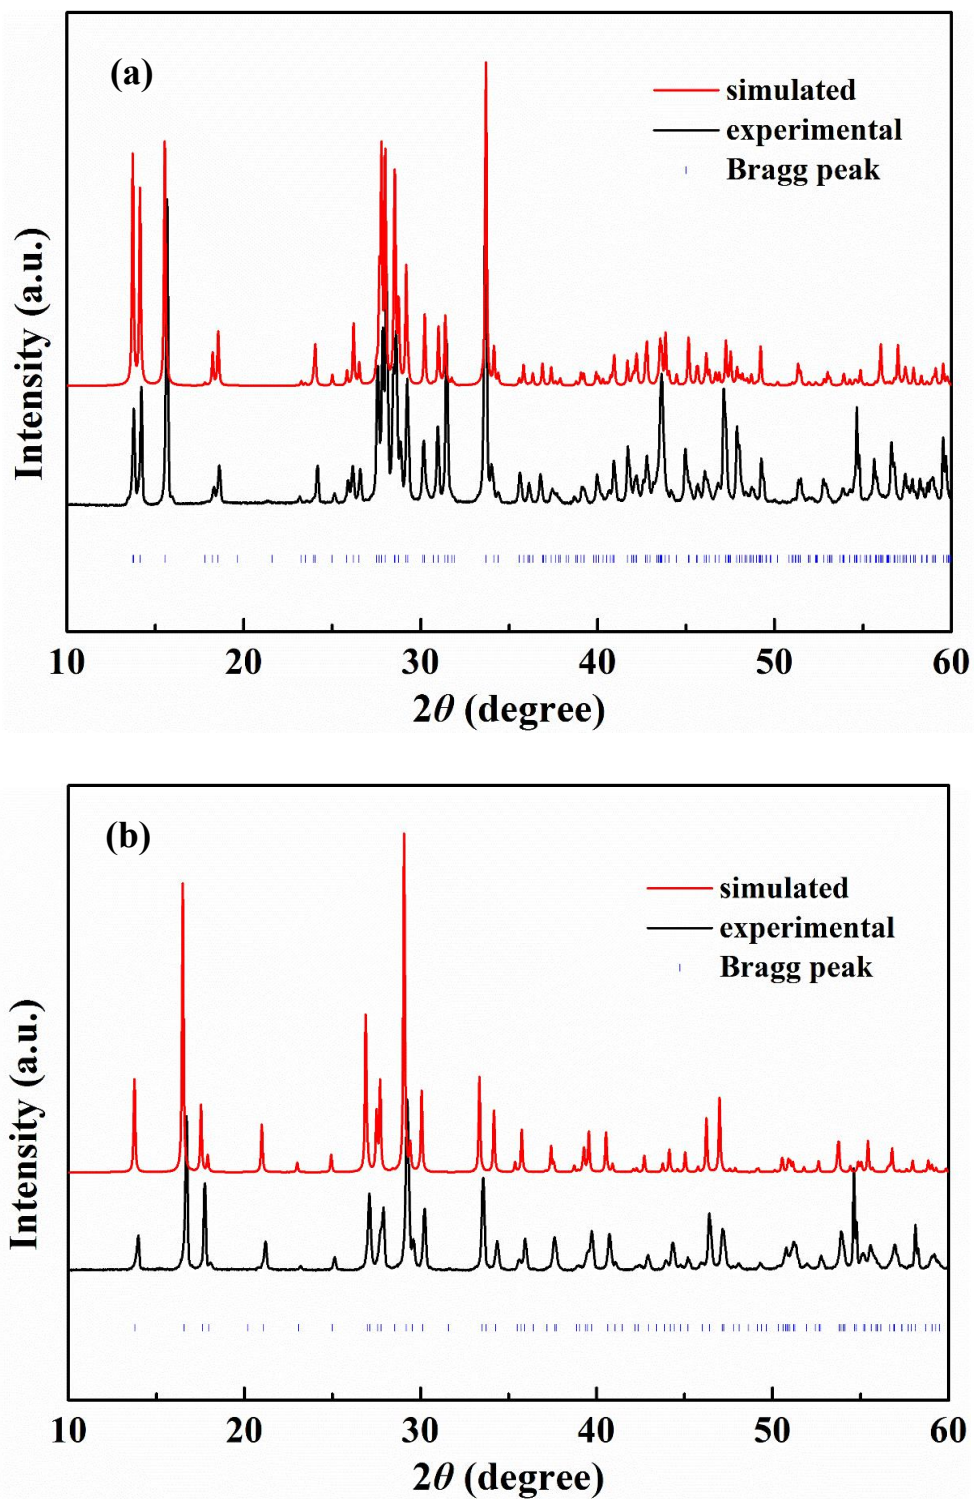

**Fig. S1.** The powder XRD patterns of  $\text{K}_2\text{Mn}(\text{PO}_3\text{F})\text{F}_3$  (a) and  $\text{Na}_2\text{Mn}(\text{HPO}_4)\text{F}_3$  (b).

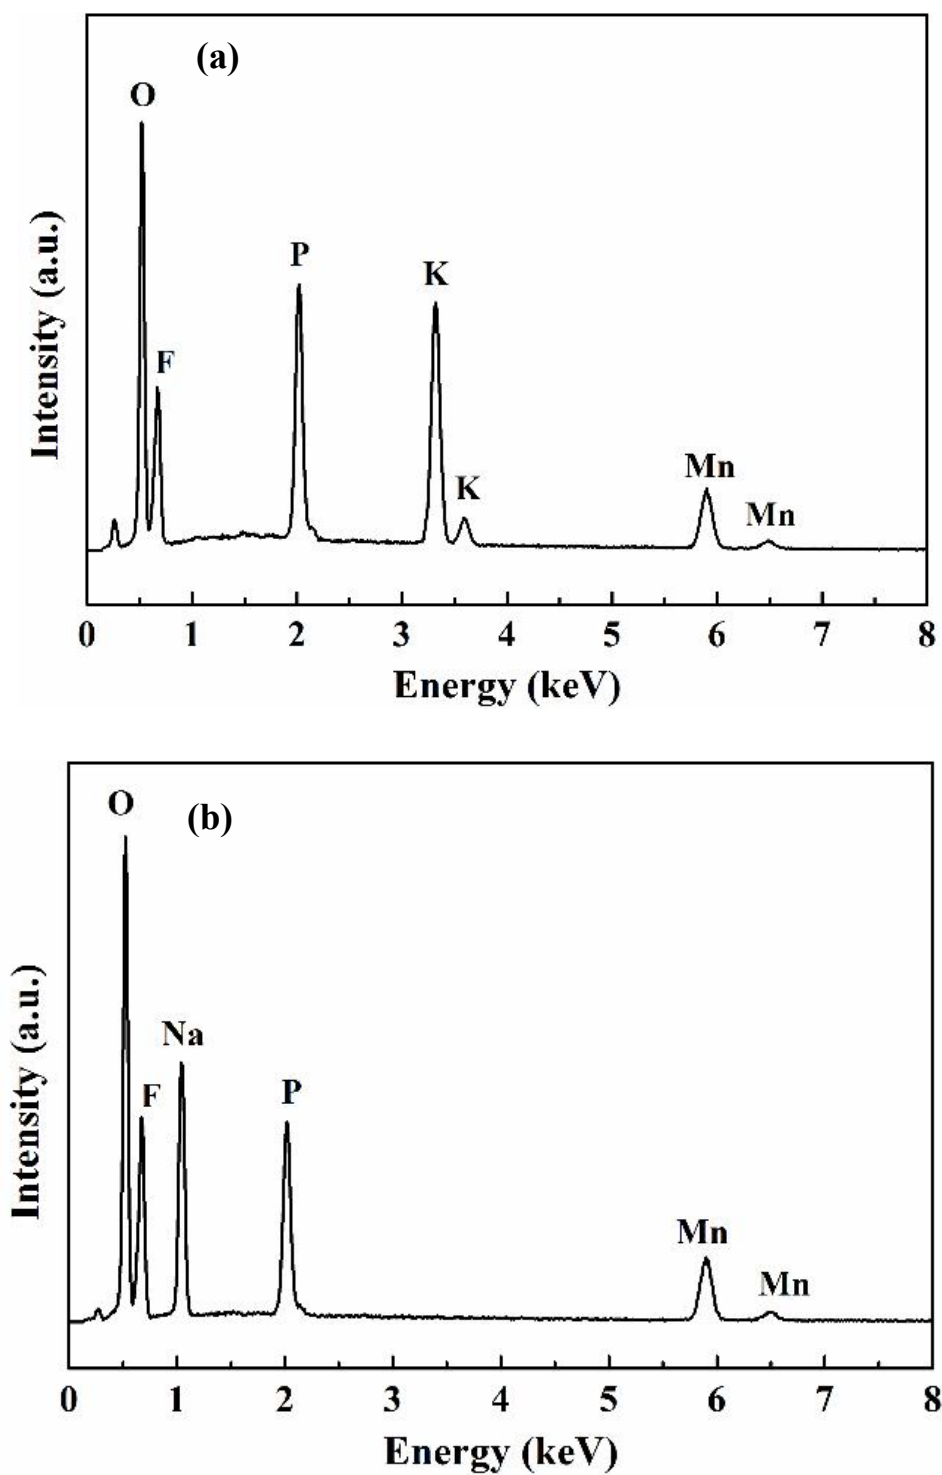

**Fig. S2.** The energy-dispersive spectrometry (EDS) elemental analyses of  $\text{K}_2\text{Mn}(\text{PO}_3\text{F})\text{F}_3$  (a) and  $\text{Na}_2\text{Mn}(\text{HPO}_4)\text{F}_3$  (b).

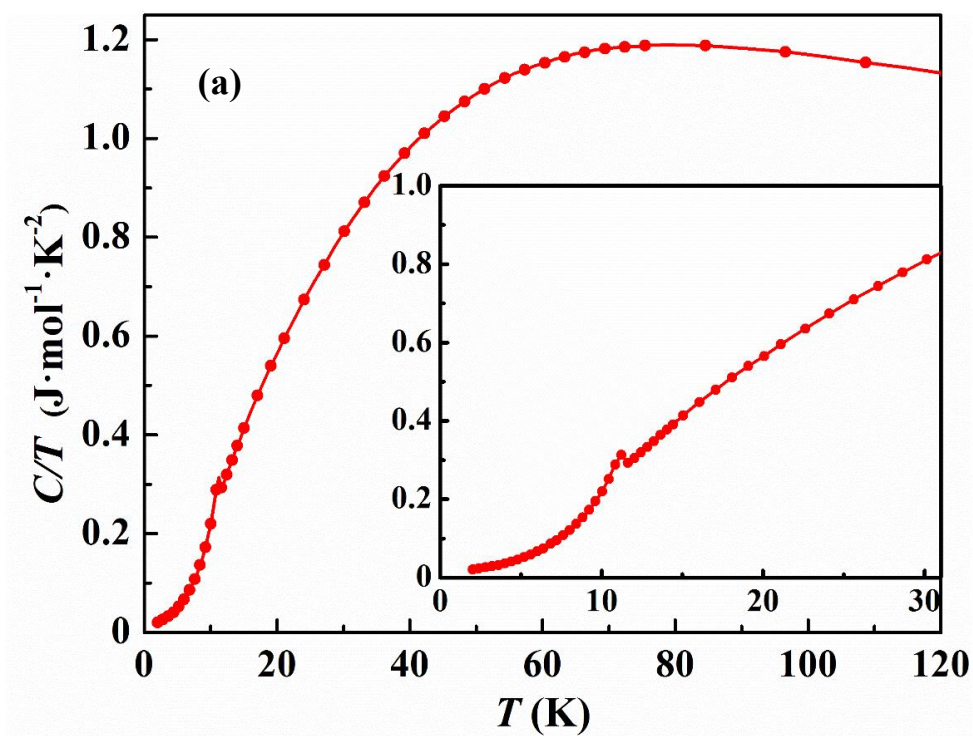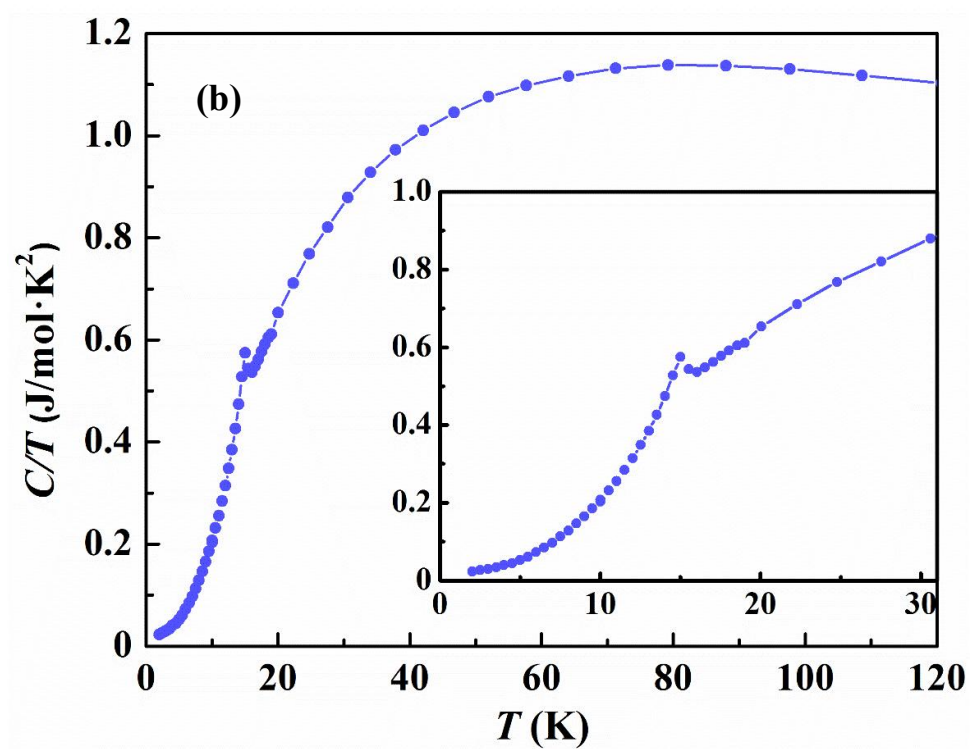

**Fig. S3.** The heat capacity at 2-120 K for  $\text{K}_2\text{Mn}(\text{PO}_3\text{F})\text{F}_3$  (a) and  $\text{Na}_2\text{Mn}(\text{HPO}_4)\text{F}_3$  (b). The inset shows an enlarged view of low temperature.

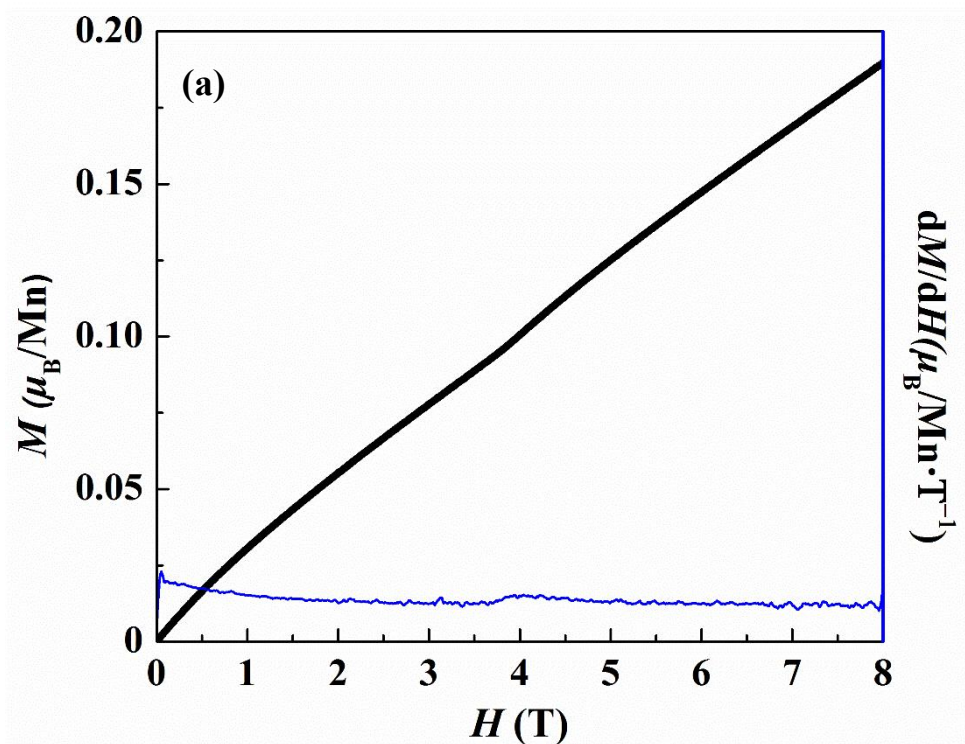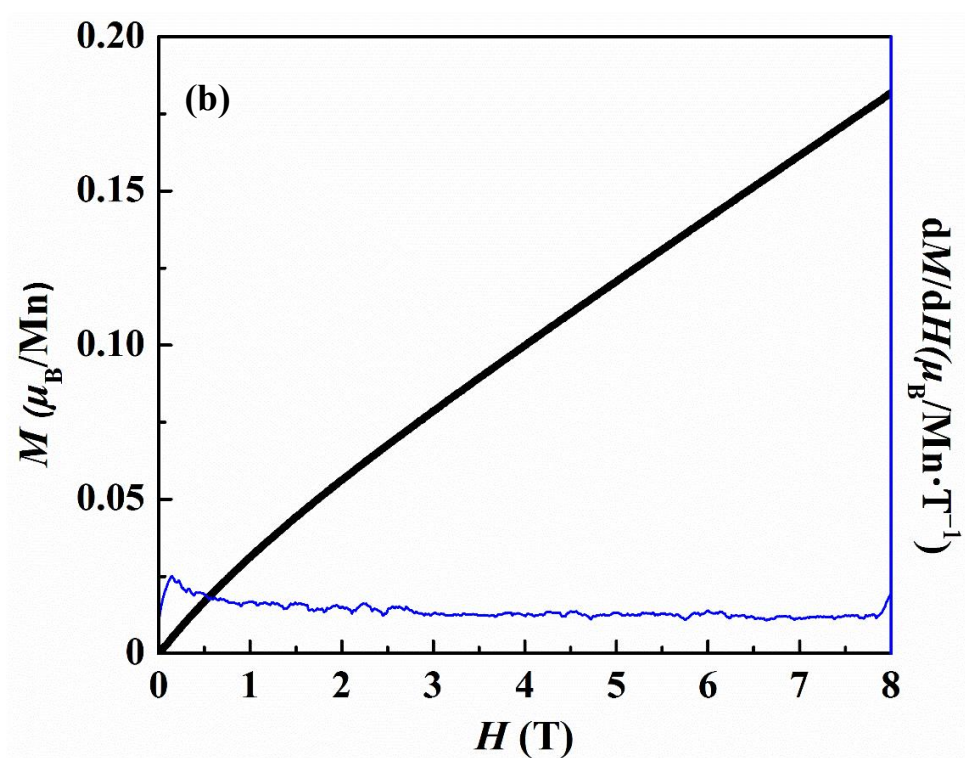

**Fig. S4.**  $dM/dH$  vs  $H$  curves for  $\text{K}_2\text{Mn}(\text{PO}_3\text{F})\text{F}_3$  (a) and  $\text{Na}_2\text{Mn}(\text{HPO}_4)\text{F}_3$  (b).

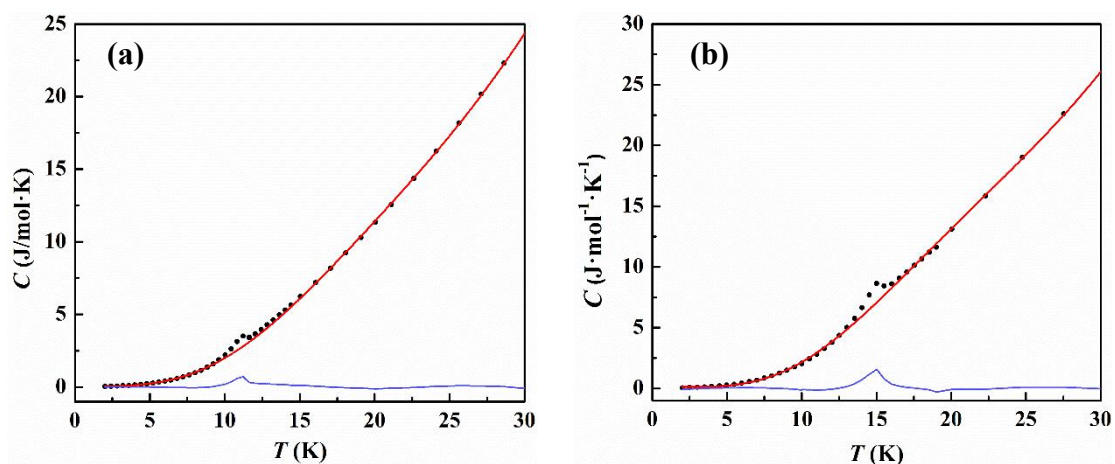

**Fig. S5.** Heat capacity data of  $\text{K}_2\text{Mn}(\text{PO}_3\text{F})\text{F}_3$  (a) and  $\text{Na}_2\text{Mn}(\text{HPO}_4)\text{F}_3$  (b) with lattice and magnetic contributions, where the red line is the lattice contribution ( $C_L$ ) fitted by the Thirring formula and the blue line is the magnetic one ( $C_m$ ).

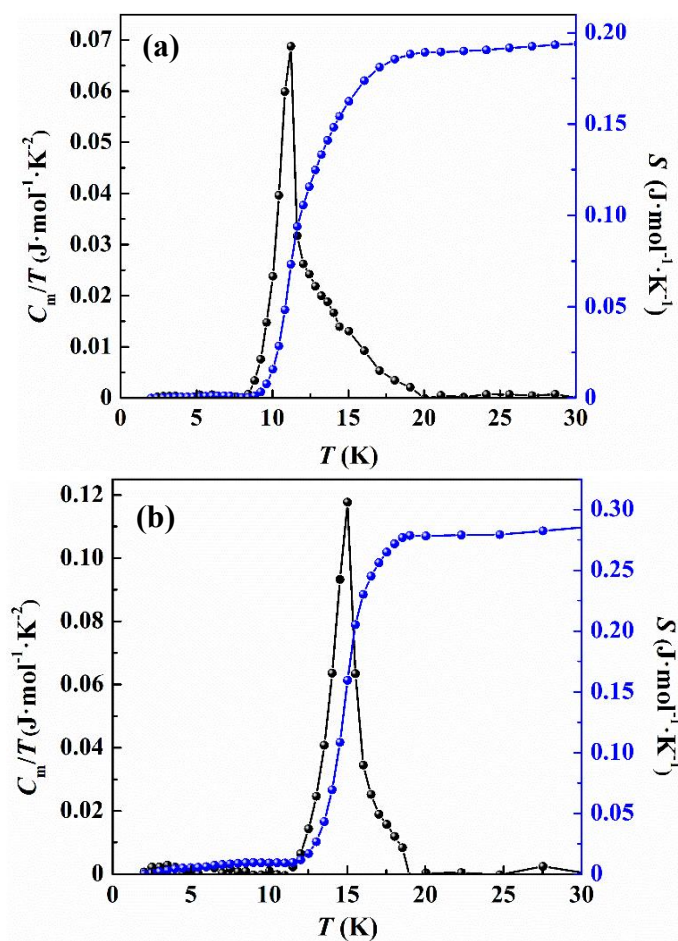

**Fig. S6.** Magnetic heat capacity and corresponding magnetic entropy for  $\text{K}_2\text{Mn}(\text{PO}_3\text{F})\text{F}_3$  (a) and  $\text{Na}_2\text{Mn}(\text{HPO}_4)\text{F}_3$  (b) from 2 to 30 K.

**Table S1.** The valence bond calculations for K<sub>2</sub>Mn(PO<sub>3</sub>F)<sub>3</sub>.

| Atom | BVS  | Valence | Atom | BVS  | Valence |
|------|------|---------|------|------|---------|
| Mn1  | 3.05 | +3      | F2   | 0.95 | -1      |
| Mn2  | 3.05 | +3      | F3   | 1.05 | -1      |
| P1   | 4.73 | +5      | F4   | 1.13 | -1      |
| K1   | 1.12 | +1      | O1   | 2.06 | -2      |
| K2   | 1.15 | +1      | O2   | 2.02 | -2      |
| F1   | 1.07 | -1      | O3   | 1.77 | -2      |

**Table S2.** The valence bond calculations for Na<sub>2</sub>Mn(HPO<sub>4</sub>)F<sub>3</sub>.

| Atom | BVS  | Valence | Atom | BVS  | Valence |
|------|------|---------|------|------|---------|
| Mn   | 3.16 | +3      | F2   | 1.02 | -1      |
| P    | 4.92 | +5      | O1   | 2.09 | -2      |
| Na1  | 0.82 | +1      | O2   | 2.04 | -2      |
| Na2  | 1.06 | +1      | O3   | 2.02 | -2      |
| F1   | 0.96 | -1      |      |      |         |
